# Supplementary material for: Simple models for the quick estimation of ground state hydrogen tunneling splittings in alcohols and other compounds
Source: Royal Society of Chemistry journal article supplement (doi:10.1039/d1cp02115j), 2021-01-01
Supplement: d1cp02115j3.xlsx [file d1cp02115j3.xlsx]

## Sheet: Example CH3OH
input	Eel	ZPEH	ZPED	wH	wD			DH (exp)	DD (exp)
unit	H	J/mol	J/mol	cm-1	cm-1			cm-1 hc	cm-1 hc
minimum	-115.779	134051	125505	291.1	231			6.08117	1.73735
transition state	-115.778	132607	124338	-294.9	-234.7
intermediate results	Vel	V0,H	V0,D
unit	cm-1 hc	cm-1 hc	cm-1 hc
barrier heights	344.641	369.49	362.529
model	EBM	EBM	BHM	BHM	RBHM	RBHM	EBHM	EBHM	SEBM	SEBM	MSM	MSM	DCM	DCM	UDCM	UDCM
output	DH (calc)	DD (calc)	DH (calc)	DD (calc)	DH (calc)	DD (calc)	DH (calc)	DD (calc)	DH (calc)	DD (calc)	DH (calc)	DD (calc)	DH (calc)	DD (calc)	DH (calc)	DD (calc)
unit	cm-1 hc	cm-1 hc	cm-1 hc	cm-1 hc	cm-1 hc	cm-1 hc	cm-1 hc	cm-1 hc	cm-1 hc	cm-1 hc	cm-1 hc	cm-1 hc	cm-1 hc	cm-1 hc	cm-1 hc	cm-1 hc
result	5.31142	1.15354	4.01509	0.775095	4.14757	0.698047	4.34696	0.90326	5.81655	1.81638	7.51656	1.35045	7.45419	1.2909	9.69328	0.913192
deviation ratio	0.873421	0.663964	0.66025	0.446137	0.682036	0.401789	0.714823	0.519908	0.956487	1.04549	1.23604	0.777306	1.22578	0.743031	1.59398	0.525625

## Sheet: New alcohol
input	Eel	ZPEH	ZPED	wH	wD			DH (exp)	DD (exp)
unit	H	J/mol	J/mol	cm-1	cm-1			cm-1 hc	cm-1 hc
minimum
transition state
intermediate results	Vel	V0,H	V0,D
unit	cm-1 hc	cm-1 hc	cm-1 hc
barrier heights	0	0	0
model	EBM	EBM	BHM	BHM	RBHM	RBHM	EBHM	EBHM	SEBM	SEBM	MSM	MSM	DCM	DCM	UDCM	UDCM
output	DH (calc)	DD (calc)	DH (calc)	DD (calc)	DH (calc)	DD (calc)	DH (calc)	DD (calc)	DH (calc)	DD (calc)	DH (calc)	DD (calc)	DH (calc)	DD (calc)	DH (calc)	DD (calc)
unit	cm-1 hc	cm-1 hc	cm-1 hc	cm-1 hc	cm-1 hc	cm-1 hc	cm-1 hc	cm-1 hc	cm-1 hc	cm-1 hc	cm-1 hc	cm-1 hc	cm-1 hc	cm-1 hc	cm-1 hc	cm-1 hc
result	#DIV/0!	#DIV/0!	58.5585	90.3171	132.318	95.3191	0	0	#DIV/0!	#DIV/0!	#DIV/0!	#DIV/0!	#NUM!	#NUM!	#NUM!	#NUM!
deviation ratio	#DIV/0!	#DIV/0!	#DIV/0!	#DIV/0!	#DIV/0!	#DIV/0!	#DIV/0!	#DIV/0!	#DIV/0!	#DIV/0!	#DIV/0!	#DIV/0!	#NUM!	#NUM!	#NUM!	#NUM!
